# Supplementary material for: Hot-Melt Extrusion as an Advantageous Technology to Obtain Effervescent Drug Products
Source: MDPI journal article supplement (doi:10.3390/pharmaceutics12080779), 2020-08-17
Supplement: s1 [file s1]

Article

# Supplementary Materials: Hot-Melt Extrusion as an Advantageous Technology to Obtain Effervescent Drug Products

Ana Luiza Lima, Ludmila A. G. Pinho, Juliano A. Chaker, Livia L. Sa-Barreto, Ricardo Neves Marreto, Tais Gratieri, Guilherme M. Gelfuso and Marcilio Cunha-Filho

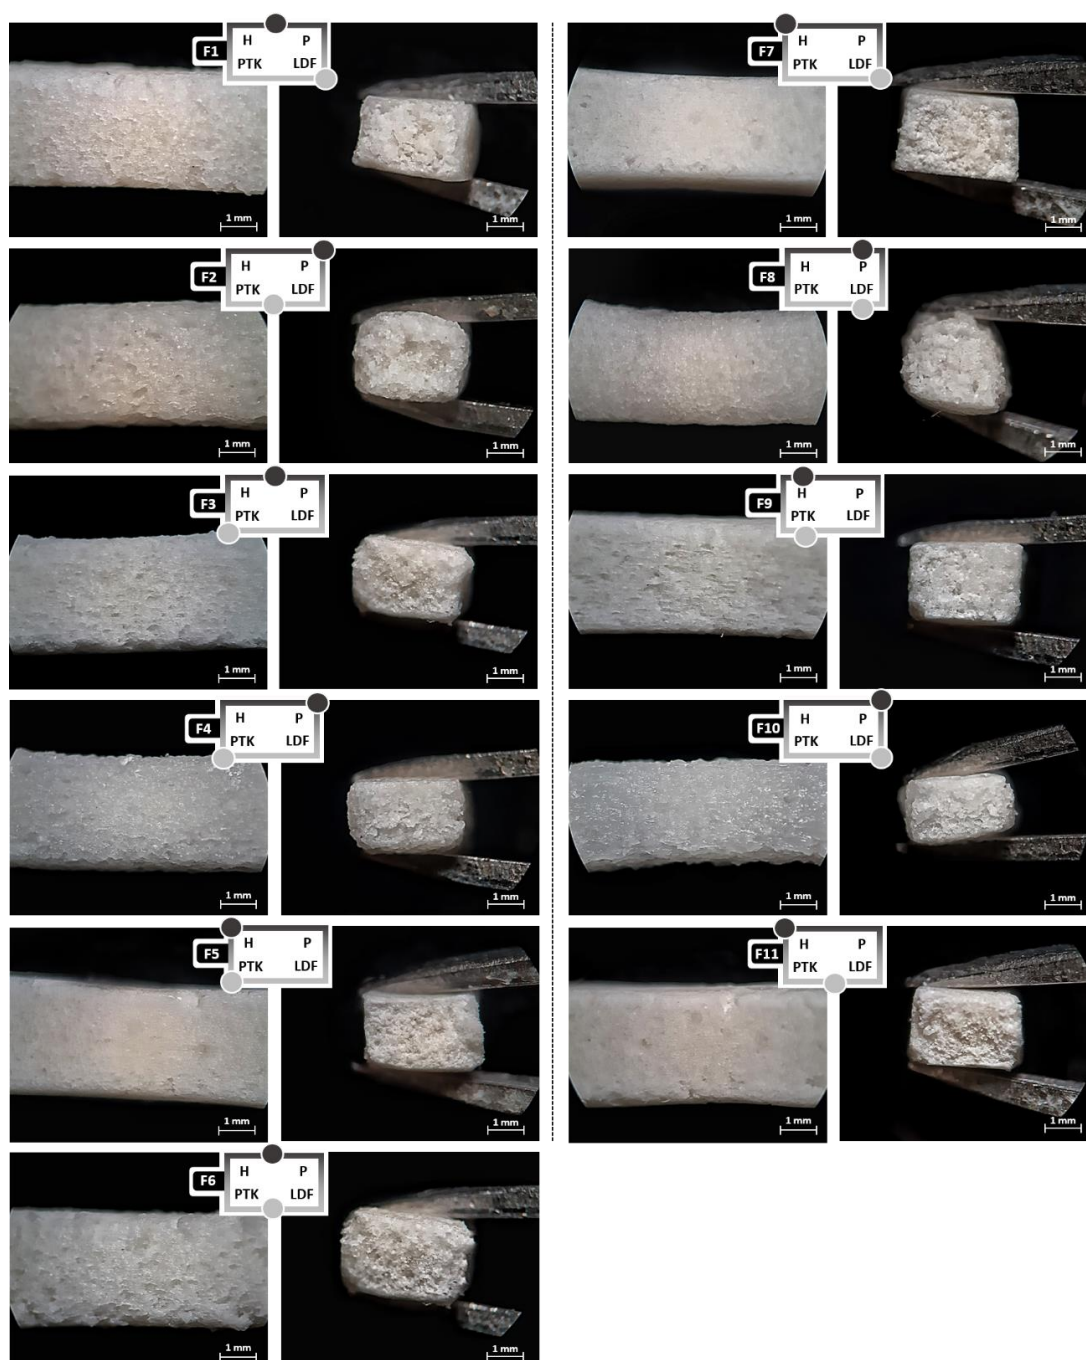

**Figure S1.** Optical microscopy photomicrographs of the longitudinal and transversal view of the filaments at a 30× magnification. .

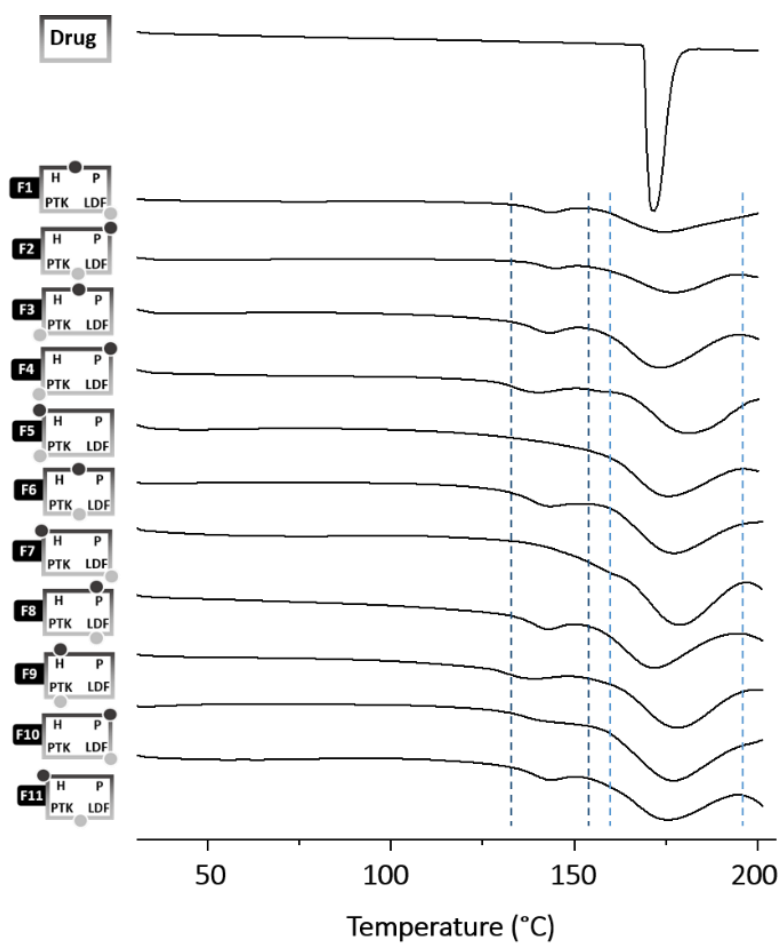

**Figure S2.** DSC curve of paracetamol as supplied and the fresh extrudates. Dark blue dotted lines show citric acid degradation and light blue dotted lines show sodium bicarbonate degradation.
